# Supplementary material
Source: HighWire-hosted journal article supplement (http://gut.bmj.com/highwire/filestream/192825/field_highwire_adjunct_files/2/2009_183749_ST2.xls)
Supplement: 2009_183749_ST2.xls [file 2009_183749_ST2.xls]

## Sheet: Sheet1
Supplementary Table 2. Liver genes ≥2-fold change in female mice exposed to aflatoxin B1 + Helicobacter hepaticus
Data from mice exposed to AFB1 only shown for comparison; all results normalized to beta-actin
Gene Symbol	Gene Title	AFB1+Hh	AFB1 only	Gender specificity (top 25)
	Upregulated	Fold change
Ubd	ubiquitin D	26.0806	1.64074	F
Vps13a	vacuolar protein sorting 13A (yeast)	17.0282	18.219
4732454E20Rik	RIKEN cDNA 4732454E20 gene	12.6622	8.38611
Ugcg	UDP-glucose ceramide glucosyltransferase	12.2526	6.85175
Saa3	serum amyloid A 3	11.8761	1.51417	F
Nrg3	neuregulin 3	9.90029	4.03251
H19	H19 fetal liver mRNA	8.29591	6.48975
Igh-VJ558 /// LOC238447 /// LOC544903 /// LOC544907 /// LOC633774 /// LOC676478 /// LOC677563	immunoglobulin heavy chain (J558 family) /// similar to immunoglobulin heavy chain variable region /// similar to immunoglobulin mu-chain /// similar to anti-poly(dC) monoclonal antibody heavy chain /// similar to Ig heavy chain V region 23 precursor /// similar to Ig heavy chain V region 102 precursor /// similar to Ig heavy chain V region VH558 A1/A4 precursor	7.69091	3.13849	F
3830431G21Rik	RIKEN cDNA 3830431G21 gene	6.83792	5.15644
Cxcl9	chemokine (C-X-C motif) ligand 9	6.69146	1.45386	F
Afp	alpha fetoprotein	6.2979	4.42805	M
4930408O21Rik	RIKEN cDNA 4930408O21 gene	6.12769	2.77927	F
Cdkn1a	cyclin-dependent kinase inhibitor 1A (P21)	5.71982	4.98335
Pparg	peroxisome proliferator activated receptor gamma	5.59689	0.711101
Klrb1d	killer cell lectin-like receptor subfamily B member 1D	5.35295	0.0763347	M
Adcy1	adenylate cyclase 1	5.28631	2.60309	M
Ifi203	Interferon activated gene 203	5.06213	4.53334
Ces3	carboxylesterase 3	5.03894	2.60659
3110047M12Rik	RIKEN cDNA 3110047M12 gene	4.95766	2.72526	F
2610305J24Rik /// BC005512 /// LOC215866 /// LOC629242 /// LOC630153 /// LOC630525 /// LOC631386 /// LOC637482 /// LOC641366 /// LOC668904 /// LOC669019 /// LOC669231 /// LOC669436 /// LOC670270 /// LOC670719 /// LOC672061 /// LOC672196 /// LOC672939 /// LOC673876 /// LOC674912 /// LOC674927 /// LOC675168 /// LOC675410 /// LOC675706 /// LOC676247 /// LOC676718 /// LOC677506	RIKEN cDNA 2610305J24 gene /// cDNA sequence BC005512 /// hypothetical protein LOC215866 /// hypothetical protein LOC629242 /// similar to melanoma antigen /// similar to melanoma antigen /// similar to melanoma antigen /// similar to melanoma antigen /// hypothetical ENV polyprotein /// similar to melanoma antigen /// hypothetical protein LOC669019 /// similar to melanoma antigen /// hypothetica…	4.78141	1.61353	F
Vangl2	vang-like 2 (van gogh, Drosophila)	4.68806	1.41148
Strn3	Striatin, calmodulin binding protein 3	4.68444	3.82146
Sfmbt1	Scm-like with four mbt domains 1	4.67658	3.73991
AB182283	cDNA sequence AB182283	4.50528	1.39272
Mem1	maternal embryonic message 1	4.47	3.82522	M
Slpi	secretory leukocyte peptidase inhibitor	4.40097	1.12113
5430405G24Rik	RIKEN cDNA 5430405G24 gene	4.35085	5.24382
Plcxd1	phosphatidylinositol-specific phospholipase C, X domain containing 1	4.33185	4.4054
BC021395	CDNA sequence BC021395	4.25108	3.72399
Chka	choline kinase alpha	4.23274	5.19909
Scd2	stearoyl-Coenzyme A desaturase 2	4.23074	1.24879
Mast2	Microtubule associated serine/threonine kinase 2	4.20637	1.53799
Igh-VJ558 /// LOC238447 /// LOC544903 /// LOC544907 /// LOC633774 /// LOC676478 /// LOC677563	immunoglobulin heavy chain (J558 family) /// similar to immunoglobulin heavy chain variable region /// similar to immunoglobulin mu-chain /// similar to anti-poly(dC) monoclonal antibody heavy chain /// similar to Ig heavy chain V region 23 precursor /// similar to Ig heavy chain V region 102 precursor /// similar to Ig heavy chain V region VH558 A1/A4 precursor	4.19729	2.41367
H2-Aa	Histocompatibility 2, class II antigen A, alpha	4.01789	2.83807
Hspb1	heat shock protein 1	3.95377	0.919795
Cp	ceruloplasmin	3.92127	4.19608
Nupr1	nuclear protein 1	3.91973	4.34192
5830418K08Rik	RIKEN cDNA 5830418K08 gene	3.91891	3.06743
Arid5b	AT rich interactive domain 5B (Mrf1 like)	3.90619	5.32661
St6galnac3	ST6 (alpha-N-acetyl-neuraminyl-2,3-beta-galactosyl-1,3)-N-acetylgalactosaminide alpha-2,6-sialyltransferase 3	3.83187	5.55614
Mtcp1	mature T-cell proliferation 1	3.79158	7.3517
1500005K14Rik	RIKEN cDNA 1500005K14 gene	3.77023	3.31236
Clock	circadian locomoter output cycles kaput	3.73257	3.1666
2610024D14Rik	RIKEN cDNA 2610024D14 gene	3.72831	2.04189
Csad	cysteine sulfinic acid decarboxylase	3.70462	3.16226
Rps6 /// LOC214738 /// LOC384383 /// LOC545640 /// LOC626259 /// LOC629575 /// LOC638497 /// LOC639593 /// LOC639750 /// LOC667739 /// LOC667922 /// LOC671432 /// LOC672620 /// LOC675985	ribosomal protein S6 /// similar to 40S ribosomal protein S6 /// similar to 40S ribosomal protein S6 /// similar to 40S ribosomal protein S6 /// similar to 40S ribosomal protein S6 /// similar to 40S ribosomal protein S6 /// similar to 40S ribosomal protein S6 /// similar to 40S ribosomal protein S6 /// similar to 40S ribosomal protein S6 /// similar to 40S ribosomal protein S6 /// similar to 40S…	3.65425	4.99715
Bre	Brain and reproductive organ-expressed protein	3.62817	4.30358
Gab2	Growth factor receptor bound protein 2-associated protein 2	3.53403	2.8732
B830007D08Rik	RIKEN cDNA B830007D08 gene	3.53261	4.26889
Satb1	special AT-rich sequence binding protein 1	3.50298	2.97974
Wfdc2	WAP four-disulfide core domain 2	3.47227	0.882647
Ikbkb	inhibitor of kappaB kinase beta	3.46174	3.61465
H2-Q1 /// 0610037M15Rik	histocompatibility 2, Q region locus 1 /// RIKEN cDNA 0610037M15 gene	3.45892	1.26059
5330421C15Rik	RIKEN cDNA 5330421C15 gene	3.45759	4.12151
Cd74	CD74 antigen (invariant polypeptide of major histocompatibility complex, class II antigen-associated)	3.4322	1.80012
Orm2	orosomucoid 2	3.42991	0.815509
Coro1a	coronin, actin binding protein 1A	3.42591	1.30375
Osbpl3	oxysterol binding protein-like 3	3.39179	1.45249
Satb1	special AT-rich sequence binding protein 1	3.38209	2.64202
Vps33a	Vacuolar protein sorting 33A (yeast)	3.36598	4.29062
Dnmt3b	DNA methyltransferase 3B	3.36192	3.97286
Tnfrsf11b	tumor necrosis factor receptor superfamily, member 11b (osteoprotegerin)	3.32566	2.81164
Prc1	protein regulator of cytokinesis 1	3.30941	6.2544
Bat2d	BAT2 domain containing 1	3.26461	2.60314
Cxcl1	chemokine (C-X-C motif) ligand 1	3.23609	1.66298
Rapgef6	Rap guanine nucleotide exchange factor (GEF) 6	3.22682	2.66391
Casc5 /// LOC677208	cancer susceptibility candidate 5 /// similar to cancer susceptibility candidate 5 isoform 2	3.22482	1.65266
LOC622976	hypothetical protein LOC622976	3.20979	1.54832
Vps54	vacuolar protein sorting 54 (yeast)	3.20741	2.7816
AI662270	expressed sequence AI662270	3.20278	2.53882
4933437K13Rik	RIKEN cDNA 4933437K13 gene	3.17424	2.35975
H2-Aa	histocompatibility 2, class II antigen A, alpha	3.16941	1.86877
Rragd	Ras-related GTP binding D	3.16755	3.55978
Dnajc1	DnaJ (Hsp40) homolog, subfamily C, member 1	3.15712	1.64735
Cxcl1	chemokine (C-X-C motif) ligand 1	3.07901	1.82164
Gimap8	GTPase, IMAP family member 8	3.07273	2.74316
2610305J24Rik /// BC005512 /// LOC629242 /// LOC630525 /// LOC631386 /// LOC637482 /// LOC641366 /// LOC668904 /// LOC669885 /// LOC670270 /// LOC672061 /// LOC672939 /// LOC672969 /// LOC673876 /// LOC674927 /// LOC675168 /// LOC675706 /// LOC676247 /// LOC676718 /// LOC677506	RIKEN cDNA 2610305J24 gene /// cDNA sequence BC005512 /// hypothetical protein LOC629242 /// similar to melanoma antigen /// similar to melanoma antigen /// similar to melanoma antigen /// hypothetical ENV polyprotein /// similar to melanoma antigen /// similar to melanoma antigen /// hypothetical protein LOC670270 /// similar to melanoma antigen /// similar to melanoma antigen /// hypothetical p…	3.0707	1.72046
Tbc1d5	TBC1 domain family, member 5	3.063	2.05072
Pllp	plasma membrane proteolipid	3.03809	4.13635
Dcun1d5	DCN1, defective in cullin neddylation 1, domain containing 5 (S. cerevisiae)	3.01817	2.27206
Zfhx1b	zinc finger homeobox 1b	3.01459	2.57004
3110050K21Rik	RIKEN cDNA 3110050K21 gene	3.01159	2.57217
Rad51l1	RAD51-like 1 (S. cerevisiae)	2.99112	1.63713
Smyd3	SET and MYND domain containing 3	2.98804	2.89252
Topors	topoisomerase I binding, arginine/serine-rich	2.98332	3.03612
Scd2	stearoyl-Coenzyme A desaturase 2	2.97146	1.23624
Rshl3	radial spokehead-like 3	2.95074	1.73552
37873	septin 10	2.95065	1.5182
C1r /// LOC667277 /// LOC677405	complement component 1, r subcomponent /// similar to Complement C1r-B subcomponent precursor (Complement component 1, r-B subcomponent) /// similar to complement component 1, r subcomponent	2.94713	2.1969
Clpx	Caseinolytic peptidase X (E.coli)	2.94428	4.94917
Rims4	regulating synaptic membrane exocytosis 4	2.94297	1.18913
Smc6	structural maintenance of chromosomes 6	2.93555	1.40717
A430107O13Rik	RIKEN cDNA A430107O13 gene	2.93003	3.1958
Ywhaz	tyrosine 3-monooxygenase/tryptophan 5-monooxygenase activation protein, zeta polypeptide	2.92149	1.72582
9530033F24Rik	RIKEN cDNA 9530033F24 gene	2.91694	2.47837
Slc41a2	solute carrier family 41, member 2	2.912	0.822044
Vps13d	Vacuolar protein sorting 13D (yeast)	2.91142	2.64473
Ddr1	discoidin domain receptor family, member 1	2.91122	2.63899
Klhl24	kelch-like 24 (Drosophila)	2.90496	1.83257
Epm2a	epilepsy, progressive myoclonic epilepsy, type 2 gene alpha	2.90431	2.08105
Rad21	RAD21 homolog (S. pombe)	2.88641	2.07959
H2-D1	histocompatibility 2, D region locus 1	2.88281	1.222
Ankib1	Ankyrin repeat and IBR domain containing 1	2.88255	2.74882
Syne2	Synaptic nuclear envelope 2	2.88006	2.56665
Gldc	Glycine decarboxylase	2.87801	3.37451
Eef2	Eukaryotic translation elongation factor 2	2.87733	2.97307
Cry1	cryptochrome 1 (photolyase-like)	2.86604	3.55386
1110014D18Rik	RIKEN cDNA 1110014D18 gene	2.86251	3.91669
Cfdp1	Craniofacial development protein 1	2.8388	5.36618
2210010L05Rik	RIKEN cDNA 2210010L05 gene	2.83818	2.52213
Agtrap	angiotensin II, type I receptor-associated protein	2.83718	3.30239
4632427E13Rik	RIKEN cDNA 4632427E13 gene	2.81453	2.85468
Tssk1	testis-specific serine kinase 1	2.78895	3.50259
S100a9	S100 calcium binding protein A9 (calgranulin B)	2.78729	1.80362
LOC665081	hypothetical protein LOC665081	2.77983	1.25008
Rsbn1	rosbin, round spermatid basic protein 1	2.77876	2.35869
Ywhaz	tyrosine 3-monooxygenase/tryptophan 5-monooxygenase activation protein, zeta polypeptide	2.77483	1.9411
Crim1	cysteine rich transmembrane BMP regulator 1 (chordin like)	2.7546	2.78943
Gabra3	Gamma-aminobutyric acid (GABA-A) receptor, subunit alpha 3	2.74057	5.00372
Ptpn21	protein tyrosine phosphatase, non-receptor type 21	2.73615	0.665569
---	12 days embryo head cDNA, RIKEN full-length enriched library, clone:3000003N14 product:hypothetical protein, full insert sequence	2.72026	1.89864
---	Immunoglobulin kappa chain complex	2.71408	3.30308
Slc12a6	solute carrier family 12, member 6	2.70797	2.01579
9130604C24Rik	RIKEN cDNA 9130604C24 gene	2.70575	2.37297
Ppp1r3g	protein phosphatase 1, regulatory (inhibitor) subunit 3G	2.7046	0.550085
Txndc5	Thioredoxin domain containing 5	2.69993	1.40808
1110067D22Rik	RIKEN cDNA 1110067D22 gene	2.69553	2.61224
Csnk2a1	casein kinase 2, alpha 1 polypeptide	2.68623	1.87584
Fbxl16	F-box and leucine-rich repeat protein 16	2.68128	1.43192
4930579G24Rik	RIKEN cDNA 4930579G24 gene	2.66869	2.18734
1110030E23Rik	RIKEN cDNA 1110030E23 gene	2.6678	2.54587
4832441B07Rik	RIKEN cDNA 4832441B07 gene	2.66708	2.31256
Lcn2	lipocalin 2	2.66458	0.471668
Kcnq1	Potassium voltage-gated channel, subfamily Q, member 1	2.66219	2.3958
Ncoa7	Nuclear receptor coactivator 7	2.66036	1.23108
Ypel2	yippee-like 2 (Drosophila)	2.65605	3.87837
Crat	carnitine acetyltransferase	2.64186	1.70805
BC023105	cDNA sequence BC023105	2.64168	1.32054
Tcf12	Transcription factor 12	2.6353	1.79368
Ubap2l	Ubiquitin associated protein 2-like	2.63525	2.54752
H2-DMa	histocompatibility 2, class II, locus DMa	2.63133	1.98106
3110032G18Rik	RIKEN cDNA 3110032G18 gene	2.62855	1.11518
Rgs18	regulator of G-protein signaling 18	2.62797	1.472
Pctk2	PCTAIRE-motif protein kinase 2	2.62596	2.41457
Aatf	Apoptosis antagonizing transcription factor	2.62594	2.34128
Aif1	allograft inflammatory factor 1	2.62263	1.83548
Inpp5f	inositol polyphosphate-5-phosphatase F	2.61931	2.27546
Suz12	Suppressor of zeste 12 homolog (Drosophila)	2.61742	1.66539
H2-Eb1	histocompatibility 2, class II antigen E beta	2.60819	1.70777
Scara3	scavenger receptor class A, member 3	2.6077	2.88676
Rgs18	regulator of G-protein signaling 18	2.60231	1.91097
Ccr2	chemokine (C-C motif) receptor 2	2.59865	1.26453
Cpxm2	carboxypeptidase X 2 (M14 family)	2.59081	2.91007
Ms4a6b	membrane-spanning 4-domains, subfamily A, member 6B	2.58856	1.49965
2610305J24Rik /// LOC668904 /// LOC669436 /// LOC670270 /// LOC672052 /// LOC672939 /// LOC677506	RIKEN cDNA 2610305J24 gene /// similar to melanoma antigen /// hypothetical protein LOC669436 /// hypothetical protein LOC670270 /// hypothetical protein LOC672052 /// similar to melanoma antigen /// similar to melanoma antigen	2.58824	1.6923
Zfp319	zinc finger protein 319	2.58771	2.47066
Rasgrp2	RAS, guanyl releasing protein 2	2.58628	1.56886
Ccnd3	Cyclin D3	2.58609	4.41476
Slc22a21	solute carrier family 22 (organic cation transporter), member 21	2.58483	1.06969
Ddr1	discoidin domain receptor family, member 1	2.58301	2.19336
Phlpp	PH domain and leucine rich repeat protein phosphatase	2.58205	1.90409
Sep10	septin 10	2.582	1.80647
Osbpl3	oxysterol binding protein-like 3	2.57665	1.76396
Tmem26	transmembrane protein 26	2.57174	0.853503
4932438A13Rik	RIKEN cDNA 4932438A13 gene	2.57026	2.68471
Nfkbie	nuclear factor of kappa light polypeptide gene enhancer in B-cells inhibitor, epsilon	2.56953	1.58133
Fin15	fibroblast growth factor inducible 15	2.56515	1.90881
Tead1	TEA domain family member 1	2.56188	0.594104
Pctk2	PCTAIRE-motif protein kinase 2	2.56015	3.63095
Exoc4	Exocyst complex component 4	2.55592	2.98149
Ptger2	prostaglandin E receptor 2 (subtype EP2)	2.54708	1.8147
Mthfd1	methylenetetrahydrofolate dehydrogenase (NADP+ dependent), methenyltetrahydrofolate cyclohydrolase, formyltetrahydrofolate synthase	2.54404	2.43711
Copa	coatomer protein complex subunit alpha	2.53672	3.19994
Ddah1	Dimethylarginine dimethylaminohydrolase 1	2.53602	2.91808
Ern1	Endoplasmic reticulum (ER) to nucleus signalling 1	2.5357	2.87938
Hmgn3	High mobility group nucleosomal binding domain 3	2.52561	2.79605
6430706D22Rik	RIKEN cDNA 6430706D22 gene	2.52436	3.35432
Efcbp1	EF hand calcium binding protein 1	2.52383	1.42422
Gpc1	glypican 1	2.5229	1.85493
Casp6	Caspase 6	2.52063	2.43752
6030451C04Rik	RIKEN cDNA 6030451C04 gene	2.51952	1.86876
Rod1	ROD1 regulator of differentiation 1 (S. pombe)	2.516	1.99013
Nedd9	neural precursor cell expressed, developmentally down-regulated gene 9	2.51417	2.60963
1810023F06Rik	RIKEN cDNA 1810023F06 gene	2.51148	1.56122
Tsc22d2	TSC22 domain family 2	2.5113	2.13538
Clec2d	C-type lectin domain family 2, member d	2.5109	0.991293
Zbtb4	Zinc finger and BTB domain containing 4	2.50952	2.88194
Jun	Jun oncogene	2.50942	1.80614
Zfyve16	zinc finger, FYVE domain containing 16	2.50754	2.14772
D030065N23Rik	RIKEN cDNA D030065N23 gene	2.50495	2.83915
2700089E24Rik	RIKEN cDNA 2700089E24 gene	2.50015	2.21637
Mat2a	methionine adenosyltransferase II, alpha	2.49393	1.68376
LOC630963	similar to spectrin alpha 1	2.49025	2.37973
Ankrd10	ankyrin repeat domain 10	2.4896	2.21549
Mrpl30 /// LOC621542 /// LOC632468	mitochondrial ribosomal protein L30 /// similar to mitochondrial ribosomal protein L30 /// similar to mitochondrial ribosomal protein L30	2.48806	1.06075
Mapk15	mitogen-activated protein kinase 15	2.48773	1.73367
Lin9	lin-9 homolog (C. elegans)	2.48469	2.00956
Cybb	cytochrome b-245, beta polypeptide	2.48276	1.47612
Zfp2	zinc finger protein 2	2.48137	1.47813
H2-Aa /// H2-Ea	histocompatibility 2, class II antigen A, alpha /// histocompatibility 2, class II antigen E alpha	2.48043	1.49203
Laptm5	lysosomal-associated protein transmembrane 5	2.47915	1.63901
St6galnac4	ST6 (alpha-N-acetyl-neuraminyl-2,3-beta-galactosyl-1,3)-N-acetylgalactosaminide alpha-2,6-sialyltransferase 4	2.4718	1.40233
Dock7	dedicator of cytokinesis 7	2.46874	2.30315
Tlk1	tousled-like kinase 1	2.45932	2.10115
H2-D1	histocompatibility 2, D region locus 1	2.45801	1.67203
Mcm4	minichromosome maintenance deficient 4 homolog (S. cerevisiae)	2.45631	1.75631
S100a8	S100 calcium binding protein A8 (calgranulin A)	2.45176	1.83062
Kif5b	kinesin family member 5B	2.44475	1.8829
37682	membrane-associated ring finger (C3HC4) 3	2.44449	3.64219
LOC629972	hypothetical protein LOC629972	2.44427	3.03583
Zfp708	zinc finger protein 708	2.44381	2.31628
Rab27a	RAB27A, member RAS oncogene family	2.44365	1.24253
Tmem56	transmembrane protein 56	2.44279	1.87666
A830039H10Rik	RIKEN cDNA A830039H10 gene	2.44245	2.85151
Snhg3 /// LOC670438	small nucleolar RNA host gene (non-protein coding) 3 /// similar to RNA, U17d small nucleolar	2.44105	2.05209
4833423F13Rik	RIKEN cDNA 4833423F13 gene	2.44068	2.29378
Trps1	trichorhinophalangeal syndrome I (human)	2.43609	1.63231
Dopey2	dopey family member 2	2.42871	2.66583
Pbk	PDZ binding kinase	2.42784	2.33489
Usp8	Ubiquitin specific peptidase 8	2.42575	3.50684
Atg16l2	Autophagy related 16 like 2 (S. cerevisiae)	2.42529	3.33259
5830443L24Rik /// LOC626578	RIKEN cDNA 5830443L24 gene /// similar to macrophage activation 2 like	2.41943	1.90483
Rbm5	RNA binding motif protein 5	2.41807	2.26747
Ankib1	ankyrin repeat and IBR domain containing 1	2.41599	1.98435
4930579K19Rik	RIKEN cDNA 4930579K19 gene	2.41578	2.36025
Tmem56	transmembrane protein 56	2.40514	1.93598
Lamb1-1	laminin B1 subunit 1	2.40379	2.74025
Prmt2	protein arginine N-methyltransferase 2	2.40041	2.08498
Soat1	sterol O-acyltransferase 1	2.39831	1.84268
Thbs1 /// LOC640441	thrombospondin 1 /// similar to thrombospondin 1	2.39819	4.37648
D1Ertd471e	DNA segment, Chr 1, ERATO Doi 471, expressed	2.39729	1.06686
Ikbke	inhibitor of kappaB kinase epsilon	2.397	1.10849
Cox7a1	cytochrome c oxidase, subunit VIIa 1	2.39026	1.7484
Rp9h	Retinitis pigmentosa 9 homolog (human)	2.3883	2.66979
Nfil3	nuclear factor, interleukin 3, regulated	2.38795	2.43263
1110028C15Rik	RIKEN cDNA 1110028C15 gene	2.3854	1.41573
LOC328277	hypothetical protein LOC328277	2.37974	2.4333
Dnajc17 /// LOC638909	DnaJ (Hsp40) homolog, subfamily C, member 17 /// similar to DnaJ (Hsp40) homolog, subfamily C, member 17	2.37957	1.97424
Clstn2	calsyntenin 2	2.37807	2.25366
9030605E09Rik	RIKEN cDNA 9030605E09 gene	2.37626	1.40232
Casp1	caspase 1	2.37386	2.22606
C76533	expressed sequence C76533	2.36838	3.33495
Col5a3	procollagen, type V, alpha 3	2.36792	1.27122
Ube2d2	Ubiquitin-conjugating enzyme E2D 2	2.36427	3.08184
4833446K15Rik	RIKEN cDNA 4833446K15 gene	2.36149	1.67543
Birc6	baculoviral IAP repeat-containing 6	2.36128	2.02483
Sltm	SAFB-like, transcription modulator	2.35602	2.39743
6720467C03Rik	RIKEN cDNA 6720467C03 gene	2.35517	2.32481
C330003B14Rik	RIKEN cDNA C330003B14 gene	2.35436	2.30348
Whdc1	WAS protein homology region 2 domain containing 1	2.35381	1.87489
Sox5	SRY-box containing gene 5	2.35125	2.23224
Arid5b	AT rich interactive domain 5B (Mrf1 like)	2.35034	2.23317
Ches1	checkpoint suppressor 1	2.34966	3.85202
D5Ertd255e	DNA segment, Chr 5, ERATO Doi 255, expressed	2.3494	2.71423
Smc5	structural maintenance of chromosomes 5	2.34606	1.88752
D9Ertd256e	DNA segment, Chr 9, ERATO Doi 256, expressed	2.34369	1.60859
AI429294	Expressed sequence AI429294	2.34312	2.29624
2310007O11Rik	RIKEN cDNA 2310007O11 gene	2.34259	1.64856
Cd44	CD44 antigen	2.34215	1.81423
Socs3	suppressor of cytokine signaling 3	2.33838	1.10013
4933424C08Rik	RIKEN cDNA 4933424C08 gene	2.33824	1.92314
Stxbp3a	syntaxin binding protein 3A	2.33714	1.81075
Dnase2a	deoxyribonuclease II alpha	2.3366	1.8754
Cd207	CD 207 antigen	2.33569	2.20155
Tead1	TEA domain family member 1	2.33494	1.54924
Cog7	Component of oligomeric golgi complex 7	2.33146	1.39659
Ints1	integrator complex subunit 1	2.33093	1.69849
AW548124	expressed sequence AW548124	2.32666	2.45179
AA408213	expressed sequence AA408213	2.32601	2.30873
Klk1b22 /// Klk1b9	kallikrein 1-related peptidase b22 /// kallikrein 1-related peptidase b9	2.32448	1.97476
Phb	Prohibitin	2.32168	4.20264
Mki67 /// LOC638774	antigen identified by monoclonal antibody Ki 67 /// similar to Antigen KI-67	2.31867	2.33086
Ccr5	chemokine (C-C motif) receptor 5	2.31752	2.13798
Tram1	translocating chain-associating membrane protein 1	2.31643	3.54499
2310014H01Rik	RIKEN cDNA 2310014H01 gene	2.31639	2.67858
5033414K04Rik	RIKEN cDNA 5033414K04 gene	2.31383	2.46176
D18Ertd232e	DNA segment, Chr 18, ERATO Doi 232, expressed	2.31273	2.50212
Tgtp	T-cell specific GTPase	2.31031	1.18334
Foxp1	Forkhead box P1	2.3089	2.75073
LOC77413	hypothetical LOC77413	2.30726	1.88118
AI447904	expressed sequence AI447904	2.30604	2.05644
Itsn1	intersectin 1 (SH3 domain protein 1A)	2.30481	2.16898
2610020H08Rik	RIKEN cDNA 2610020H08 gene	2.3026	2.33154
Btg1	B-cell translocation gene 1, anti-proliferative	2.30245	2.15385
Lypd6	LY6/PLAUR domain containing 6	2.29927	1.15857
Ets1	E26 avian leukemia oncogene 1, 5' domain	2.29625	1.71363
Tceb1	transcription elongation factor B (SIII), polypeptide 1	2.29511	1.80879
D330040H18Rik	RIKEN cDNA D330040H18 gene	2.28158	2.28607
Ifi205 /// Mnda	interferon activated gene 205 /// myeloid cell nuclear differentiation antigen	2.27653	1.78816
Mbnl2	Muscleblind-like 2	2.27558	2.81771
Tmco3	transmembrane and coiled-coil domains 3	2.27458	3.54659
Mcm3 /// LOC671904	minichromosome maintenance deficient 3 (S. cerevisiae) /// similar to DNA replication licensing factor MCM3 (DNA polymerase alpha holoenzyme-associated protein P1) (P1-MCM3)	2.26959	1.56256
Arhgap29	Rho GTPase activating protein 29	2.26945	1.91428
Alas1	Aminolevulinic acid synthase 1	2.26901	1.12413
Rnpep	arginyl aminopeptidase (aminopeptidase B)	2.26643	2.46098
Zfp553	zinc finger protein 553	2.26224	1.13656
BB114266	Expressed sequence BB114266	2.26096	1.70873
Ythdf3	YTH domain family 3	2.25872	2.34058
Rdh14	retinol dehydrogenase 14 (all-trans and 9-cis)	2.25764	2.50355
Lilrb3 /// LOC619608	leukocyte immunoglobulin-like receptor, subfamily B (with TM and ITIM domains), member 3 /// hypothetical LOC619608	2.25757	1.90691
37870	septin 7	2.25642	1.8836
Cnbp	cellular nucleic acid binding protein	2.25585	1.88771
Scd2	stearoyl-Coenzyme A desaturase 2	2.25473	1.28523
9030425P06Rik	RIKEN cDNA 9030425P06 gene	2.25463	2.58199
6720456B07Rik	RIKEN cDNA 6720456B07 gene	2.25335	2.36774
Cpox	coproporphyrinogen oxidase	2.25294	1.57433
Lrp2	low density lipoprotein receptor-related protein 2	2.25266	2.26859
Herc2	hect (homologous to the E6-AP (UBE3A) carboxyl terminus) domain and RCC1 (CHC1)-like domain (RLD) 2	2.2503	1.62138
Sntb2	syntrophin, basic 2	2.24945	1.74834
Snx10	Sorting nexin 10	2.24827	1.88892
Qser1	glutamine and serine rich 1	2.24751	2.42344
Mynn	myoneurin	2.24622	1.83614
Arfgap3	ADP-ribosylation factor GTPase activating protein 3	2.24401	2.32581
D7Ertd715e	DNA segment, Chr 7, ERATO Doi 715, expressed	2.24362	1.48961
AI428301	expressed sequence AI428301	2.2408	1.52754
Tpd52	Tumor protein D52	2.24063	1.78522
Mgat2	mannoside acetylglucosaminyltransferase 2	2.23908	2.2226
Mtdh	Metadherin	2.23637	2.17365
Lzp-s	P lysozyme structural	2.23568	2.6064
Slc35a2	solute carrier family 35 (UDP-galactose transporter), member 2	2.23203	2.11664
Pnpla5	patatin-like phospholipase domain containing 5	2.23104	1.73429
Nfia	nuclear factor I/A	2.22839	2.42451
Irf2bp2 /// LOC672960	interferon regulatory factor 2 binding protein 2 /// similar to interferon regulatory factor 2 binding protein 2	2.22734	2.3347
Adcy7	adenylate cyclase 7	2.22488	2.03314
Eif2a	eukaryotic translation initiation factor 2a	2.22093	2.30059
Etohd2	ethanol decreased 2	2.21991	2.88518
Hdac9	histone deacetylase 9	2.21989	1.22949
Sesn3	sestrin 3	2.21972	1.51598
Hist3h2a	histone 3, H2a	2.2186	2.80691
1110028C15Rik	RIKEN cDNA 1110028C15 gene	2.21832	1.80897
Cdkal1	CDK5 regulatory subunit associated protein 1-like 1	2.21433	2.55891
LOC667118 /// LOC669797 /// LOC675760	similar to Zinc finger BED domain containing protein 4 /// similar to Zinc finger BED domain containing protein 4 /// similar to Zinc finger BED domain containing protein 4	2.21333	2.69595
Plxna2	plexin A2	2.21124	2.08664
Eif4e	Eukaryotic translation initiation factor 4E	2.21095	3.14157
4932439K10Rik	RIKEN cDNA 4932439K10 gene	2.20675	1.76151
AU042651	expressed sequence AU042651	2.20584	2.12562
Saa2	serum amyloid A 2	2.20515	0.382098
Dctn6	dynactin 6	2.20488	1.74023
Pdgfc	platelet-derived growth factor, C polypeptide	2.20416	2.17213
Supt16h	Suppressor of Ty 16 homolog (S. cerevisiae)	2.2017	2.92691
1110004E09Rik	RIKEN cDNA 1110004E09 gene	2.20122	1.94253
Rgs2	regulator of G-protein signaling 2	2.20019	2.04778
LOC640370 /// LOC667653 /// LOC672953	hypothetical LOC640370 /// hypothetical protein LOC667653 /// hypothetical protein LOC672953	2.19898	1.66182
Saa1	serum amyloid A 1	2.19671	0.424986
Sbp	spermine binding protein	2.19666	2.63689
Saa1	serum amyloid A 1	2.19553	0.422296
4831440E17Rik	RIKEN cDNA 4831440E17 gene	2.19475	1.96973
Pstk	phosphoseryl-tRNA kinase	2.19388	2.88047
D19Ertd386e	DNA segment, Chr 19, ERATO Doi 386, expressed	2.19323	3.27244
Igfbp1	insulin-like growth factor binding protein 1	2.19321	2.23658
Eif2ak4	Eukaryotic translation initiation factor 2 alpha kinase 4	2.19187	3.474
Sdccag3	serologically defined colon cancer antigen 3	2.18879	3.55454
Camk1d	Calcium/calmodulin-dependent protein kinase ID	2.18857	2.54374
Sesn1	sestrin 1	2.18818	2.28257
Eif4g1	eukaryotic translation initiation factor 4, gamma 1	2.18802	1.81364
Ehd2	EH-domain containing 2	2.18774	3.17849
8430436C05Rik	RIKEN cDNA 8430436C05 gene	2.18766	2.33202
Olfm3	olfactomedin 3	2.18619	1.33753
2410089E03Rik /// LOC546032 /// LOC669465	RIKEN cDNA 2410089E03 gene /// hypothetical LOC546032 /// hypothetical protein LOC669465	2.18544	1.97466
Zzz3	zinc finger, ZZ domain containing 3	2.18433	1.75181
Hadhsc	L-3-hydroxyacyl-Coenzyme A dehydrogenase, short chain	2.18353	1.68955
Rabepk	Rab9 effector protein with kelch motifs	2.1807	2.8914
Herpud2	HERPUD family member 2	2.18064	1.32884
Garnl1	GTPase activating RANGAP domain-like 1	2.17893	2.07727
Elovl6	ELOVL family member 6, elongation of long chain fatty acids (yeast)	2.17873	1.78682
Igj	immunoglobulin joining chain	2.17788	3.46657
Fcgr1	Fc receptor, IgG, high affinity I	2.17643	1.45555
9530025L08Rik	RIKEN cDNA 9530025L08 gene	2.17634	3.24343
8030447M02Rik	RIKEN cDNA 8030447M02 gene	2.17628	2.65398
Tex2	testis expressed gene 2	2.17118	1.39413
AI131651	expressed sequence AI131651	2.17079	2.37898
Oprs1	Opioid receptor, sigma 1	2.1704	2.38738
9430025M13Rik	RIKEN cDNA 9430025M13 gene	2.16987	1.88408
LOC56628	MHC (A.CA/J(H-2K-f) class I antigen	2.16952	0.932816
Tloc1	Translocation protein 1	2.16948	3.22497
Sdc4	syndecan 4	2.16916	1.52689
Lasp1	LIM and SH3 protein 1	2.16854	2.28097
0610013E23Rik	RIKEN cDNA 0610013E23 gene	2.16851	1.89627
LOC630509 /// LOC674192	similar to H-2 class I histocompatibility antigen, Q7 alpha chain precursor (QA-2 antigen) /// region containing histocompatibility 2, Q region locus 9; histocompatibility 2, Q region locus 7	2.16785	1.83312
Zfp593	zinc finger protein 593	2.16768	2.61018
Clca1	chloride channel calcium activated 1	2.1663	1.8352
Zfp306	zinc finger protein 306	2.16623	2.98726
B3galnt2	UDP-GalNAc:betaGlcNAc beta 1,3-galactosaminyltransferase, polypeptide 2	2.16563	1.87441
Chka	choline kinase alpha	2.16529	3.54784
2010109K09Rik	RIKEN cDNA 2010109K09 gene	2.16525	2.35927
2310022A10Rik	RIKEN cDNA 2310022A10 gene	2.16459	1.94752
AI788669	expressed sequence AI788669	2.16419	1.68319
D130007H15Rik	RIKEN cDNA D130007H15 gene	2.16217	3.06544
Nme1	expressed in non-metastatic cells 1, protein	2.16172	1.3665
Zdhhc9	zinc finger, DHHC domain containing 9	2.16075	3.08483
Gpr135	G protein-coupled receptor 135	2.15985	3.00724
Man1a2	Mannosidase, alpha, class 1A, member 2	2.15918	3.87864
Paics	phosphoribosylaminoimidazole carboxylase, phosphoribosylaminoribosylaminoimidazole, succinocarboxamide synthetase	2.15862	1.84663
BC032204	cDNA sequence BC032204	2.15504	1.72712
LOC67660	Hypothetical LOC67660	2.15487	1.31732
Usp9x	ubiquitin specific peptidase 9, X chromosome	2.154	2.54076
1810059G22Rik	RIKEN cDNA 1810059G22 gene	2.15353	2.8676
Il2rg	interleukin 2 receptor, gamma chain	2.15333	1.58984
Nfia	nuclear factor I/A	2.15152	1.89446
Cd14	CD14 antigen	2.15151	1.67984
Atr	Ataxia telangiectasia and Rad3 related	2.14923	1.93258
Itgb1bp1	Integrin beta 1 binding protein 1	2.14604	3.03463
Mfap1	microfibrillar-associated protein 1	2.14526	2.09295
C1qb	complement component 1, q subcomponent, beta polypeptide	2.14455	1.43581
2900009J20Rik	RIKEN cDNA 2900009J20 gene	2.14425	1.72077
Spbc25	spindle pole body component 25 homolog (S. cerevisiae)	2.14302	1.44383
Epn2	epsin 2	2.13926	1.78794
Arid5b	AT rich interactive domain 5B (Mrf1 like)	2.13911	2.16712
Col27a1	procollagen, type XXVII, alpha 1	2.13858	1.99241
Ube2d2	ubiquitin-conjugating enzyme E2D 2	2.13532	1.82936
2610005L07Rik /// A430108E01Rik /// LOC547150	RIKEN cDNA 2610005L07 gene /// RIKEN cDNA A430108E01 gene /// similar to p47 protein isoform a	2.13511	1.50542
LOC433810	similar to transmembrane protein SHREW1	2.13437	1.58394
Cotl1	Coactosin-like 1 (Dictyostelium)	2.13398	1.12988
6330417A16Rik	RIKEN cDNA 6330417A16 gene	2.13344	1.92132
Ssr1	signal sequence receptor, alpha	2.13233	2.30259
Tacc2	Transforming, acidic coiled-coil containing protein 2	2.13089	2.27826
Hey2	hairy/enhancer-of-split related with YRPW motif 2	2.13086	2.49606
E030018N11Rik	RIKEN cDNA E030018N11 gene	2.13012	2.22466
Tmem43	transmembrane protein 43	2.12847	2.66143
6430570G24	Hypothetical protein 6430570G24	2.12656	2.57887
Nars2	asparaginyl-tRNA synthetase 2 (mitochondrial)(putative)	2.12646	2.28332
Sephs2	selenophosphate synthetase 2	2.12636	1.2632
Smad7	MAD homolog 7 (Drosophila)	2.12619	1.96468
A930041I02Rik	RIKEN cDNA A930041I02 gene	2.12483	1.87912
Pdzk1ip1	PDZK1 interacting protein 1	2.12438	1.63069
Mbtd1	Mbt domain containing 1	2.12429	2.75034
37869	septin 6	2.12372	2.2026
Ncoa5	Nuclear receptor coactivator 5	2.12354	2.7529
A830043J08Rik	RIKEN cDNA A830043J08 gene	2.12327	1.35998
Sp3	Trans-acting transcription factor 3	2.12141	2.43795
B3galt1	UDP-Gal:betaGlcNAc beta 1,3-galactosyltransferase, polypeptide 1	2.12044	1.70442
Cxcl10	chemokine (C-X-C motif) ligand 10	2.11904	1.32178
Dsp	desmoplakin	2.11692	1.90343
2610028H07Rik	RIKEN cDNA 2610028H07 gene	2.11517	1.53534
Ric8	resistance to inhibitors of cholinesterase 8 homolog (C. elegans)	2.11422	1.90655
Atp2a2	ATPase, Ca++ transporting, cardiac muscle, slow twitch 2	2.11342	2.21593
2900057D21Rik	RIKEN cDNA 2900057D21 gene	2.11299	2.04645
Lrrc24	leucine rich repeat containing 24	2.11293	1.78081
Rbm5	RNA binding motif protein 5	2.11106	4.18095
Senp6	SUMO/sentrin specific peptidase 6	2.10853	1.388
Rrm2	ribonucleotide reductase M2	2.10824	1.64333
Cyp2j9	cytochrome P450, family 2, subfamily j, polypeptide 9	2.10805	1.90592
Wsb1	WD repeat and SOCS box-containing 1	2.1078	1.66915
Ankrd11	ankyrin repeat domain 11	2.10736	1.66628
1200007D18Rik	RIKEN cDNA 1200007D18 gene	2.10241	1.82802
Nrip1	nuclear receptor interacting protein 1	2.10153	1.85836
Armc8	armadillo repeat containing 8	2.09962	1.53012
37680	membrane-associated ring finger (C3HC4) 1	2.09908	2.78525
Efcbp1	EF hand calcium binding protein 1	2.0986	1.54137
Lrig1	Leucine-rich repeats and immunoglobulin-like domains 1	2.09684	2.34981
Nap1l1	nucleosome assembly protein 1-like 1	2.09645	1.92305
Apob	apolipoprotein B	2.09393	1.50927
Pou2f3	POU domain, class 2, transcription factor 3	2.09113	1.78299
Ccl5	chemokine (C-C motif) ligand 5	2.08996	1.29561
Uap1l1	UDP-N-acteylglucosamine pyrophosphorylase 1-like 1	2.08878	2.65876
B4galt7	xylosylprotein beta1,4-galactosyltransferase, polypeptide 7 (galactosyltransferase I)	2.08778	2.04548
C130051F05Rik	RIKEN cDNA C130051F05 gene	2.08764	2.54407
D15Wsu126e	DNA segment, Chr 15, Wayne State University 126, expressed	2.08719	2.88705
Cdc42ep5	CDC42 effector protein (Rho GTPase binding) 5	2.08666	2.24801
Snai2	snail homolog 2 (Drosophila)	2.08621	1.92971
Hnrph1	Heterogeneous nuclear ribonucleoprotein H1	2.08607	2.01033
Rad51l1	RAD51-like 1 (S. cerevisiae)	2.08441	1.63703
AL033314	Expressed sequence AL033314	2.08069	2.65856
Efhd2	EF hand domain containing 2	2.07933	3.33412
Mettl9	methyltransferase like 9	2.07913	1.91057
Tmem77	Transmembrane protein 77	2.0784	2.21719
Hsd3b2	hydroxy-delta-5-steroid dehydrogenase, 3 beta- and steroid delta-isomerase 2	2.07676	1.39311
Gphn	Gephyrin	2.07605	1.86549
Aldh18a1	aldehyde dehydrogenase 18 family, member A1	2.07394	1.67269
Atp2a3	ATPase, Ca++ transporting, ubiquitous	2.07145	1.47552
Tmem4	transmembrane protein 4	2.07072	2.0608
Gnaq	guanine nucleotide binding protein, alpha q polypeptide	2.06788	2.26266
Gbp2	guanylate nucleotide binding protein 2	2.06728	0.733483
Marcks	myristoylated alanine rich protein kinase C substrate	2.06624	1.80156
Vps52 /// LOC631721	vacuolar protein sorting 52 (yeast) /// similar to vacuolar protein sorting 52	2.06576	2.09441
Thoc1	THO complex 1	2.06539	2.38387
Sftpd	surfactant associated protein D	2.06424	1.55668
Mib1	mindbomb homolog 1 (Drosophila)	2.06386	1.99283
1810011O10Rik	RIKEN cDNA 1810011O10 gene	2.06299	2.55264
Gpatc2	G patch domain containing 2	2.0622	2.86224
MGC73635	similar to histone 2a	2.06033	1.58954
D14Ertd581e	DNA segment, Chr 14, ERATO Doi 581, expressed	2.058	2.9088
Tspan33	tetraspanin 33	2.05772	1.92065
L3mbtl3	L(3)mbt-like 3 (Drosophila)	2.05757	3.10169
Insig1	insulin induced gene 1	2.05749	1.33203
Erbb2ip	Erbb2 interacting protein	2.05709	2.17194
Csnk1g1	casein kinase 1, gamma 1	2.05703	2.25129
Sepn1	selenoprotein N, 1	2.05608	2.46421
0610011I04Rik	RIKEN cDNA 0610011I04 gene	2.05568	1.26645
Mpa2l /// LOC626578 /// LOC673101	macrophage activation 2 like /// similar to macrophage activation 2 like /// similar to macrophage activation 2 like	2.0532	1.54016
6330407G11Rik	RIKEN cDNA 6330407G11 gene	2.05306	2.74904
Sf3b2	splicing factor 3b, subunit 2	2.0529	2.00472
Psmb2	Proteasome (prosome, macropain) subunit, beta type 2	2.05288	1.75097
Mak10	MAK10 homolog, amino-acid N-acetyltransferase subunit, (S. cerevisiae)	2.05091	2.17273
Serpinb6a	Serine (or cysteine) peptidase inhibitor, clade B, member 6a	2.0501	2.36716
Lasp1	LIM and SH3 protein 1	2.04994	1.66754
1700029I01Rik /// LOC666532 /// LOC671566	RIKEN cDNA 1700029I01 gene /// similar to zinc finger protein 665 /// similar to zinc finger protein 665	2.04981	1.79002
Cept1	Choline/ethanolaminephosphotransferase 1	2.04929	2.17366
Cpeb2	cytoplasmic polyadenylation element binding protein 2	2.04922	2.12183
Pira1 /// Pira11 /// Pira2 /// Pira3 /// Pira4 /// Pira6 /// Lilrb3 /// LOC619608 /// LOC669449 /// LOC669458 /// LOC675749	paired-Ig-like receptor A1 /// paired-Ig-like receptor A11 /// paired-Ig-like receptor A2 /// paired-Ig-like receptor A3 /// paired-Ig-like receptor A4 /// paired-Ig-like receptor A6 /// leukocyte immunoglobulin-like receptor, subfamily B (with TM and ITIM domains), member 3 /// hypothetical LOC619608 /// similar to paired-Ig-like receptor A11 /// similar to paired-Ig-like receptor A11 /// simila…	2.04849	2.22621
Myo1b	myosin IB	2.04791	2.15667
Prr14	Proline rich 14	2.04752	3.50519
Cp	ceruloplasmin	2.04589	3.82291
Incenp	inner centromere protein	2.04562	1.67602
Crtc3	CREB regulated transcription coactivator 3	2.04504	1.8501
Atxn2	Ataxin 2	2.04442	1.93166
Hectd2	HECT domain containing 2	2.04334	1.48108
Adk	adenosine kinase	2.0431	1.93904
Rint1	RAD50 interactor 1	2.0431	2.1227
Thy1	thymus cell antigen 1, theta	2.04199	1.18484
Cxadr	coxsackievirus and adenovirus receptor	2.04124	1.68678
Cstf3	Cleavage stimulation factor, 3' pre-RNA, subunit 3	2.04115	2.40162
Exoc4	Exocyst complex component 4	2.03823	1.91391
Ppp3ca	Protein phosphatase 3, catalytic subunit, alpha isoform	2.03792	1.89156
BC068281	cDNA sequence BC068281	2.03683	1.76602
Ctla2a	cytotoxic T lymphocyte-associated protein 2 alpha	2.03479	1.42534
Commd2	COMM domain containing 2	2.03474	1.64638
Acp1	acid phosphatase 1, soluble	2.03469	2.83134
Atp13a3	ATPase type 13A3	2.03426	1.09616
Sos1	Son of sevenless homolog 1 (Drosophila)	2.0342	1.73836
B330012G18Rik	RIKEN cDNA B330012G18 gene	2.03304	2.6466
Cdc73	Vcell division cycle 73, Paf1/RNA polymerase II complex component, homolog (S. cerevisiae)	2.03291	1.77708
Rfc4	replication factor C (activator 1) 4	2.0309	1.41594
LOC622373	similar to 40S ribosomal protein S21	2.03016	2.51908
Icos	inducible T-cell co-stimulator	2.02988	1.3743
Dnase2a	deoxyribonuclease II alpha	2.02969	1.44293
Mrg1	myeloid ecotropic viral integration site-related gene 1	2.02788	1.92061
5830404H04Rik	RIKEN cDNA 5830404H04 gene	2.02776	1.76328
C76213	expressed sequence C76213	2.02688	2.45608
Smc1a	structural maintenance of chromosomes 1A	2.02673	1.40552
Tnrc6a	trinucleotide repeat containing 6a	2.02657	1.461
Gstm3	glutathione S-transferase, mu 3	2.02629	1.19998
Irf2bp2 /// LOC672960	interferon regulatory factor 2 binding protein 2 /// similar to interferon regulatory factor 2 binding protein 2	2.02579	1.84606
AW146242	expressed sequence AW146242	2.02492	2.00324
Tnrc15	trinucleotide repeat containing 15	2.02462	2.40947
BC063263	cDNA sequence BC063263	2.02399	1.94514
D11Ertd730e	DNA segment, Chr 11, ERATO Doi 730, expressed	2.02233	1.40985
Ppp2r5e	Protein phosphatase 2, regulatory subunit B (B56), epsilon isoform	2.02227	1.55121
Ppp2r5e	protein phosphatase 2, regulatory subunit B (B56), epsilon isoform	2.01994	2.00182
Pcm1	Pericentriolar material 1	2.0196	2.84152
Psmd6	proteasome (prosome, macropain) 26S subunit, non-ATPase, 6	2.01917	1.77708
Ablim2	actin-binding LIM protein 2	2.01857	1.89096
Gsk3b	Glycogen synthase kinase 3 beta	2.0181	2.11689
Rpo1-4	RNA polymerase 1-4	2.01677	2.34751
Spred1	sprouty protein with EVH-1 domain 1, related sequence	2.01606	1.88461
Btbd15	BTB (POZ) domain containing 15	2.01584	2.64606
---	0 day neonate kidney cDNA, RIKEN full-length enriched library, clone:D630029P09 product:unclassifiable, full insert sequence	2.01542	1.79817
Neo1	neogenin	2.01532	2.27714
Rapgef1	Rap guanine nucleotide exchange factor (GEF) 1	2.01428	1.4982
Ldlrad3	low density lipoprotein receptor class A domain containing 3	2.01284	1.80022
Bcas2	breast carcinoma amplified sequence 2	2.01274	2.25637
Slc9a5	solute carrier family 9 (sodium/hydrogen exchanger), member 5	2.01224	2.22851
Qser1	glutamine and serine rich 1	2.01035	2.21867
---	0 day neonate kidney cDNA, RIKEN full-length enriched library, clone:D630011L08 product:hypothetical protein, full insert sequence	2.00941	2.43965
Ppp1r8	protein phosphatase 1, regulatory (inhibitor) subunit 8	2.00929	1.83069
Itga1	Integrin alpha 1	2.00866	2.69919
H2-Ob	histocompatibility 2, O region beta locus	2.00827	2.29254
B230342M21Rik	RIKEN cDNA B230342M21 gene	2.00817	2.45629
A430106J12Rik	RIKEN cDNA A430106J12 gene	2.00727	1.6183
Polg	polymerase (DNA directed), gamma	2.00597	2.31113
Mcl1	myeloid cell leukemia sequence 1	2.00524	1.24718
Wasf2	WAS protein family, member 2	2.00516	1.66239
BC025546	cDNA sequence BC025546	2.00511	1.08131
AU020772	Expressed sequence AU020772	2.00301	2.5098
Minpp1	multiple inositol polyphosphate histidine phosphatase 1	2.00189	1.73408
Tmem30a	transmembrane protein 30A	2.0018	1.8396
Tmem123	transmembrane protein 123	2.0018	1.85873
Znrf1	zinc and ring finger 1	2.00123	1.78782
Slfn5	schlafen 5	2.0001	1.60199
Flot2	Flotillin 2	1.99872	2.06615
5730508B09Rik	RIKEN cDNA 5730508B09 gene	1.9983	1.51758
AI851523	expressed sequence AI851523	1.99755	2.55853
Arhgap5	Rho GTPase activating protein 5	1.99672	1.88633
Wdr26	WD repeat domain 26	1.99597	2.73401
Ctss	cathepsin S	1.99573	1.51972
Rps9	ribosomal protein S9	1.99556	1.88786
	Downregulated
Atp6v0a1	ATPase, H+ transporting, lysosomal V0 subunit A1	-5.9261	-1.66603
Proc	protein C	-5.85329	-3.00605
Phca	phytoceramidase, alkaline	-4.57518	-1.51216
Iqwd1	IQ motif and WD repeats 1	-4.4585	-0.938966
Sult5a1	Sulfotransferase family 5A, member 1	-4.00412	-0.828225	M
A930011E06Rik	RIKEN cDNA A930011E06 gene	-3.98106	-2.21873
Nfe2	nuclear factor, erythroid derived 2	-3.76881	-1.61746	F
Slc1a2	solute carrier family 1 (glial high affinity glutamate transporter), member 2	-3.65403	-1.41828
Dbp	D site albumin promoter binding protein	-3.4082	-4.46921	F
Ercc4	excision repair cross-complementing rodent repair deficiency, complementation group 4	-3.26607	-1.71933
Acly	ATP citrate lyase	-3.23289	-5.56281	F
4833422M21Rik	RIKEN cDNA 4833422M21 gene	-3.05342	-0.827156	M
4933426I21Rik	RIKEN cDNA 4933426I21 gene	-2.96983	-1.75137
Serpinb6c	serine (or cysteine) peptidase inhibitor, clade B, member 6c	-2.95594	-2.03469
Stox2	Storkhead box 2	-2.95354	-0.73892
Dao1	D-amino acid oxidase 1	-2.93921	-1.04875
Mup1	major urinary protein 1	-2.90211	-0.778026	M
LOC574418	hypothetical LOC574418	-2.88204	-0.909312
Sstr3	somatostatin receptor 3	-2.85429	-1.02629
4930578N16Rik	RIKEN cDNA 4930578N16 gene	-2.79113	-1.53576
Irak1bp1	interleukin-1 receptor-associated kinase 1 binding protein 1	-2.76421	-2.42459
Aff2	AF4/FMR2 family, member 2	-2.76268	-0.782269
Ing5	inhibitor of growth family, member 5	-2.75922	-0.724451
Trim27	tripartite motif protein 27	-2.67527	-1.0691	M
Nf2	neurofibromatosis 2	-2.66336	-1.09483
Slc25a19	solute carrier family 25 (mitochondrial deoxynucleotide carrier), member 19	-2.61461	-1.52467
Cyp17a1	cytochrome P450, family 17, subfamily a, polypeptide 1	-2.58337	-0.654673	F
Psmd7	proteasome (prosome, macropain) 26S subunit, non-ATPase, 7	-2.51567	-0.441405
Nfia	nuclear factor I/A	-2.50605	-0.626547
C330019G07Rik	RIKEN cDNA C330019G07 gene	-2.495	-0.93787
Rsl1	Regulator of sex limited protein-Slp 1	-2.48209	-1.17182
8030497O21Rik	RIKEN cDNA 8030497O21 gene	-2.44829	-1.18781
Mxd4 /// LOC635153	Max dimerization protein 4 /// similar to Max dimerization protein 4	-2.42356	-0.780424
Adora2b	adenosine A2b receptor	-2.41804	-1.016
Pscd1	pleckstrin homology, Sec7 and coiled-coil domains 1	-2.34373	-1.66042	F
Oat	ornithine aminotransferase	-2.33724	-1.36513
---	Adult male hypothalamus cDNA, RIKEN full-length enriched library, clone:A230076B10 product:unclassifiable, full insert sequence	-2.2979	-1.19717
Btf3 /// LOC640665 /// LOC665385 /// LOC677433	basic transcription factor 3 /// similar to basic transcription factor 3 /// similar to basic transcription factor 3 /// similar to basic transcription factor 3	-2.29707	-1.00911
Prnp	Prion protein	-2.24012	-1.86382
Slc34a3	solute carrier family 34 (sodium phosphate), member 3	-2.23108	-1.05693
Lin7c	lin-7 homolog C (C. elegans)	-2.22784	-2.4281
Gna12	guanine nucleotide binding protein, alpha 12	-2.20425	-1.3593
Fbxo21	F-box only protein 21	-2.1947	-0.979262
Pla2g4e	phospholipase A2, group IVE	-2.18862	-0.943188
2410076I21Rik	RIKEN cDNA 2410076I21 gene	-2.1824	-1.21621
---	13 days embryo heart cDNA, RIKEN full-length enriched library, clone:D330017K01 product:unclassifiable, full insert sequence	-2.18168	-1.0104
Slc9a3	solute carrier family 9 (sodium/hydrogen exchanger), member 3	-2.18031	-0.671847
Gpiap1	GPI-anchored membrane protein 1	-2.1673	-1.3863
Rgs3	regulator of G-protein signaling 3	-2.16283	-2.14974
Chrm1	cholinergic receptor, muscarinic 1, CNS	-2.15581	-0.998059
Ccdc25	coiled-coil domain containing 25	-2.14422	-0.775439
Zfp449	zinc finger protein 449	-2.13074	-2.47454
Fto	fatso	-2.13071	-1.34518
4930434E21Rik	RIKEN cDNA 4930434E21 gene	-2.12934	-0.807632
Per3	period homolog 3 (Drosophila)	-2.11387	-1.58167
---	0 day neonate thymus cDNA, RIKEN full-length enriched library, clone:A430057L20 product:unclassifiable, full insert sequence	-2.111	-0.728703
Cyp4a10 /// BC013476	cytochrome P450, family 4, subfamily a, polypeptide 10 /// cDNA sequence BC013476	-2.10948	-0.830211
Rab31	RAB31, member RAS oncogene family	-2.10804	-1.72396
4930540E01Rik	RIKEN cDNA 4930540E01 gene	-2.10086	-1.15908
LOC435565	similar to interferon-inducible GTPase	-2.09644	-0.993397
Gpr1	G protein-coupled receptor 1	-2.09193	-0.75352
Fmo3	flavin containing monooxygenase 3	-2.08525	-0.632369
2310069B03Rik	RIKEN cDNA 2310069B03 gene	-2.07137	-1.47688
Slc22a3	solute carrier family 22 (organic cation transporter), member 3	-2.06519	-2.36881
Camk2d	calcium/calmodulin-dependent protein kinase II, delta	-2.06344	-1.25946
Gna12	guanine nucleotide binding protein, alpha 12	-2.05967	-1.29282
Glb1l	galactosidase, beta 1-like	-2.04835	-0.971407
Pcp4l1	Purkinje cell protein 4-like 1	-2.03949	-1.17766
Hbs1l	Hbs1-like (S. cerevisiae)	-2.03729	-1.25801
Txnl1	thioredoxin-like 1	-2.02235	-8.35845
Guf1	GUF1 GTPase homolog (S. cerevisiae)	-2.02023	-0.894436
8430419L09Rik	RIKEN cDNA 8430419L09 gene	-2.01782	-0.765938
Cyp7a1	cytochrome P450, family 7, subfamily a, polypeptide 1	-2.01562	-1.37501
5033428B15Rik	RIKEN cDNA 5033428B15 gene	-2.01486	-0.935295
Per3	period homolog 3 (Drosophila)	-2.01078	-1.49983
5230400M06Rik	RIKEN cDNA 5230400M06 gene	-2.0089	-0.667744
5730557B15Rik	RIKEN cDNA 5730557B15 gene	-2.00554	-1.05527
Prei4	preimplantation protein 4	-2.00541	-1.28674
